# Supplementary material
Source: PubMed Central journal article supplement (PMC4799498)
Supplement: supp_fj.15-279091_Supplemental_Figure1.pdf [file supp_fj.15-279091_Supplemental_Figure1.pdf]

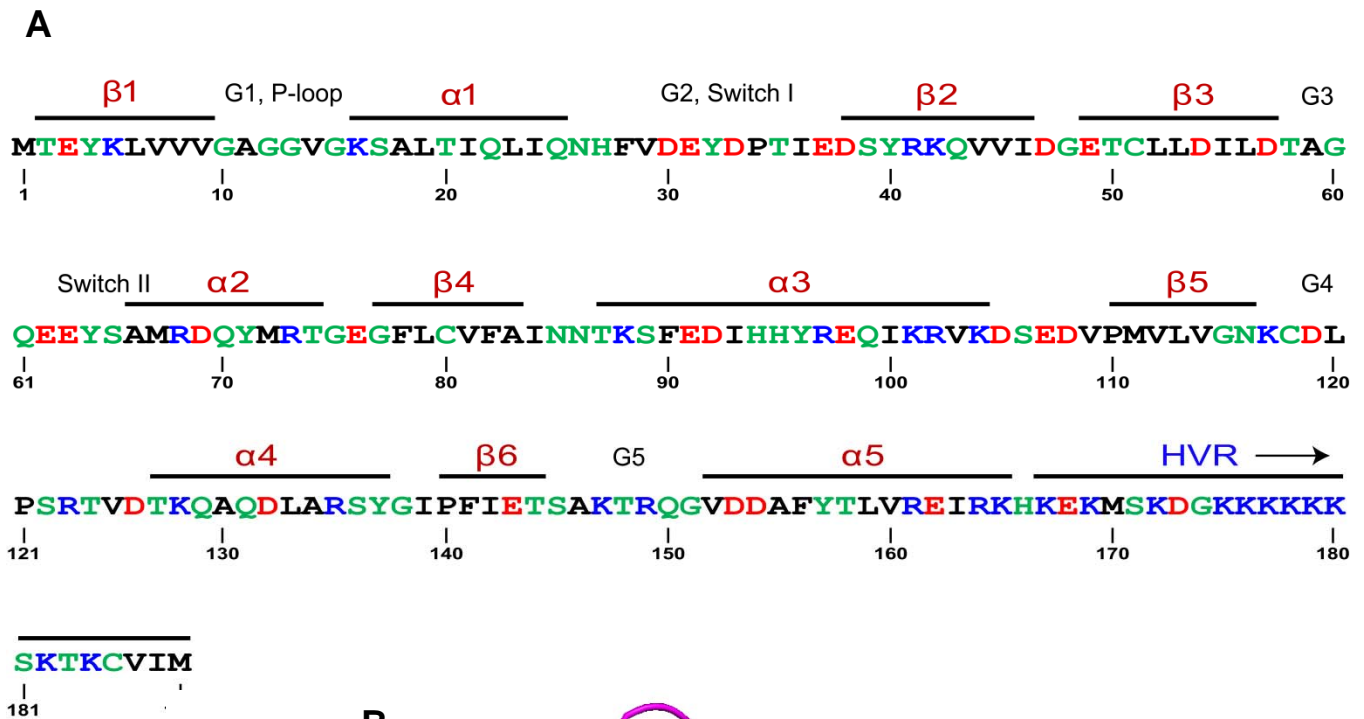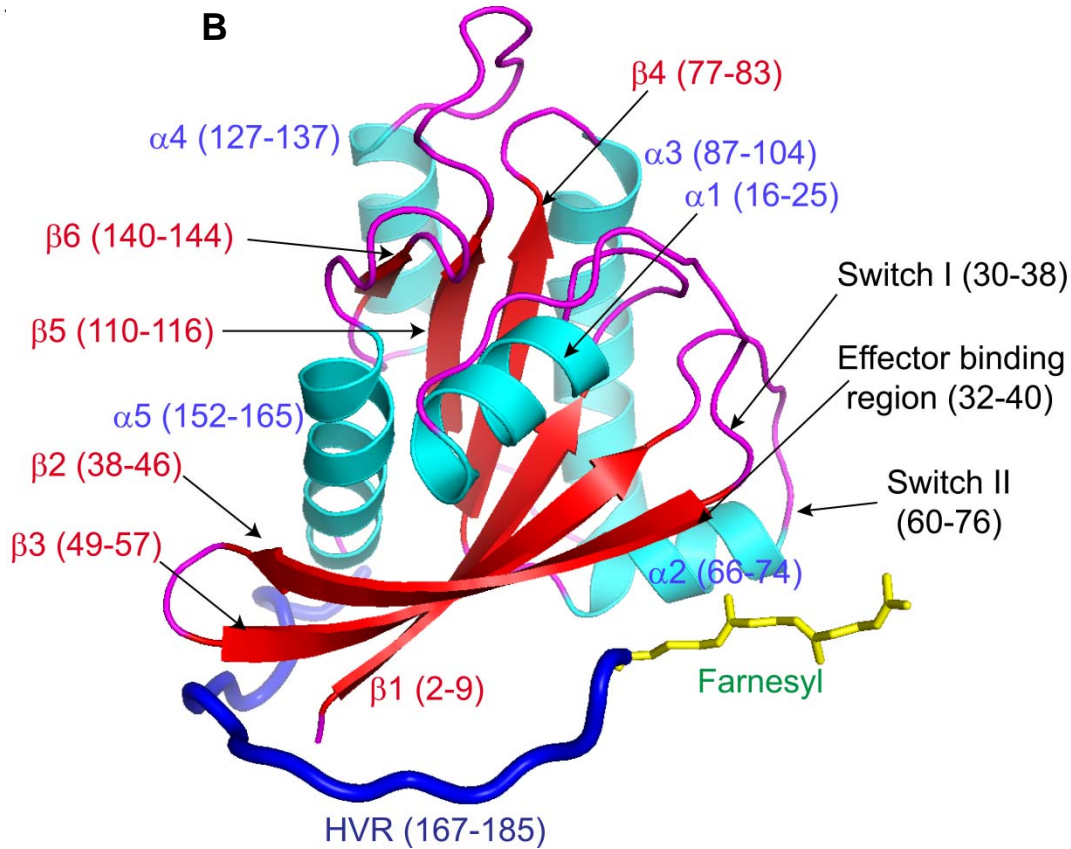

**Supplemental Figure 1.** K-Ras4B sequence and structure. (A) The sequence of the K-Ras4B protein. In the sequence, hydrophobic, polar/glycine, positively charged, and negatively charged residues are colored black, green, blue, and red, respectively. Protein domains including the hypervariable region (HVR) are marked on the sequences. (B) A modeled structure of K-Ras4B protein in the GTP-bound state. The catalytic domain in the cartoon representation is colored cyan and red for the  $\beta$ -sheet and  $\alpha$ -helix secondary structures, respectively. The HVR in the tube representation is colored blue, and the farnesyl as a stick is colored yellow. Functional regions are marked on the structure.
