# Supplementary material
Source: PubMed Central journal article supplement (PMC4799498)
Supplement: supp_fj.15-279091_Supplemental_Figure2.pdf [file supp_fj.15-279091_Supplemental_Figure2.pdf]

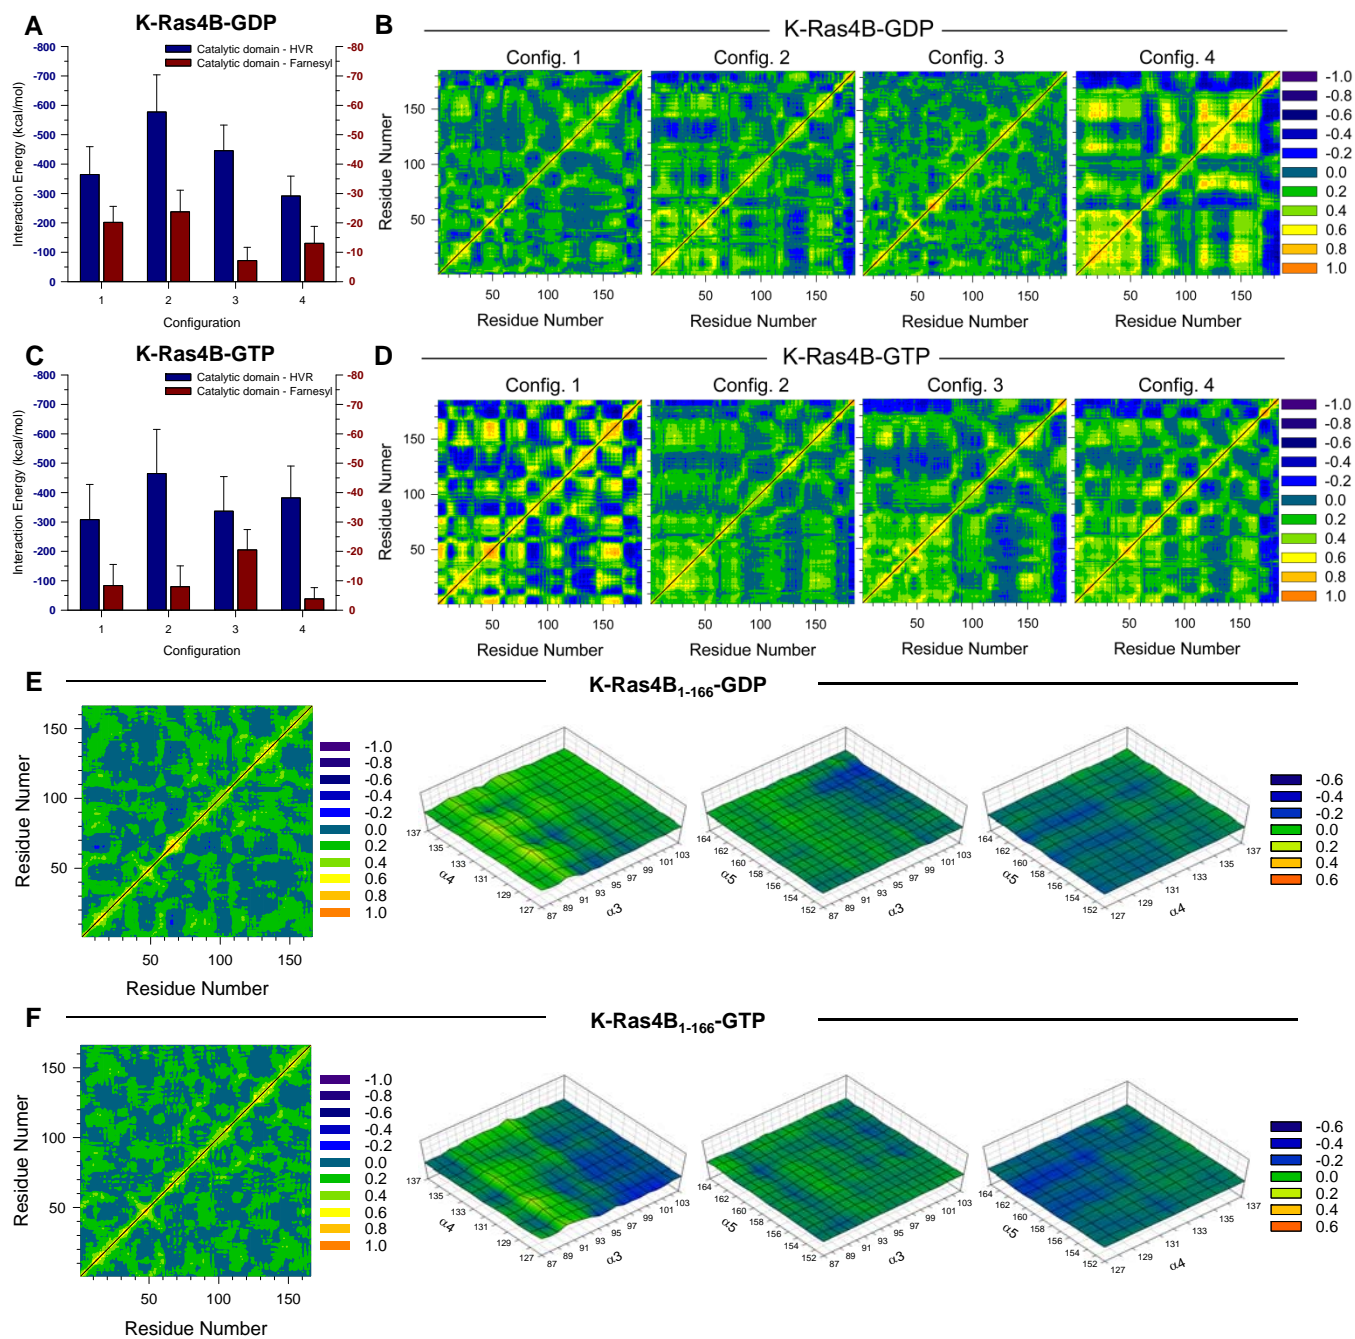

**Supplemental Figure 2.** (A) Averaged total interaction energies of the catalytic domain with the HVR and the farnesyl, and (B) two-dimensional dynamical cross-correlation map (DCCM) of the residues motions across the protein domains for the GDP-bound K-Ras4B in the aqueous environment. (C) Averaged total interaction energies of the catalytic domain with the HVR and the farnesyl, and (D) two-dimensional DCCM of the residues motions across the protein domains for the GTP-bound K-Ras4B in the aqueous environment. The catalytic domain-HVR interaction uses the scale of interaction energy on the left (blue). The catalytic domain-farnesyl interaction uses the scale of interaction energy on the right (red). (E) Two-dimensional DCCM of the residues motions across the protein domains (left panel) and three-dimensional DCCM of the helix-to-helix motions including  $\alpha_3$ - $\alpha_4$ ,  $\alpha_3$ - $\alpha_5$ , and  $\alpha_4$ - $\alpha_5$  helices in the allosteric lobe (right panels) for the GDP-bound catalytic domain only K-Ras4B<sub>1-166</sub>. (F) The same for the GTP-bound catalytic domain only K-Ras4B<sub>1-166</sub>. For the two-dimensional DCCM, positively correlated residues with correlation coefficient,  $C(i,j) = 1$  (red), anti-correlated (negatively correlated) residues with correlation coefficient,  $C(i,j) = -1$  (dark purple), and un-correlated residues with correlation coefficient,  $C(i,j) = 0$  (dark green) are shown. For the three-dimensional DCCM, Positively correlated residues with correlation coefficient,  $C(i,j) = 0.6$  (red), anti-correlated (negatively correlated) residues with correlation coefficient,  $C(i,j) = -0.6$  (dark purple), and un-correlated residues with correlation coefficient,  $C(i,j) = 0$  (green) are shown.
